# Supplementary material for: Sensitivity of Heterotrophic Bacteria in the Low-Salinity Water Areas and Estuary in Siak District toward Pathogenic Bacteria in Fish
Source: Hindawi journal article supplement (doi:10.1155/2019/7456410), 2019-06-10
Supplement: f1 [file 7456410.f1.pdf]

Table 1. The Results Of The Measurement Of The Quality Of The Waters

| station   | Kordinat       | pH  | Salinity (ppt) | brightness (cm) | temp (°C) | current (m/s) | OD (mg/L) |
|-----------|----------------|-----|----------------|-----------------|-----------|---------------|-----------|
| Stasiun 1 |                |     |                |                 |           |               |           |
| N         | 01°06'41,6''   | 6,5 | 27             | 23,5            | 29        | 0,5           | 6,2       |
| E         | 102°12'19,2''  |     |                |                 |           |               |           |
| Stasiun 2 |                |     |                |                 |           |               |           |
| N         | 01°12' 26''    | 6   | 10             | 15              | 28        | 0,3           | 5,24      |
| E         | 102°09' 53,7'' |     |                |                 |           |               |           |

OD Oxygen dissout

Figure 1. Elektroforegram DNA Bacteria

- Isolat H2

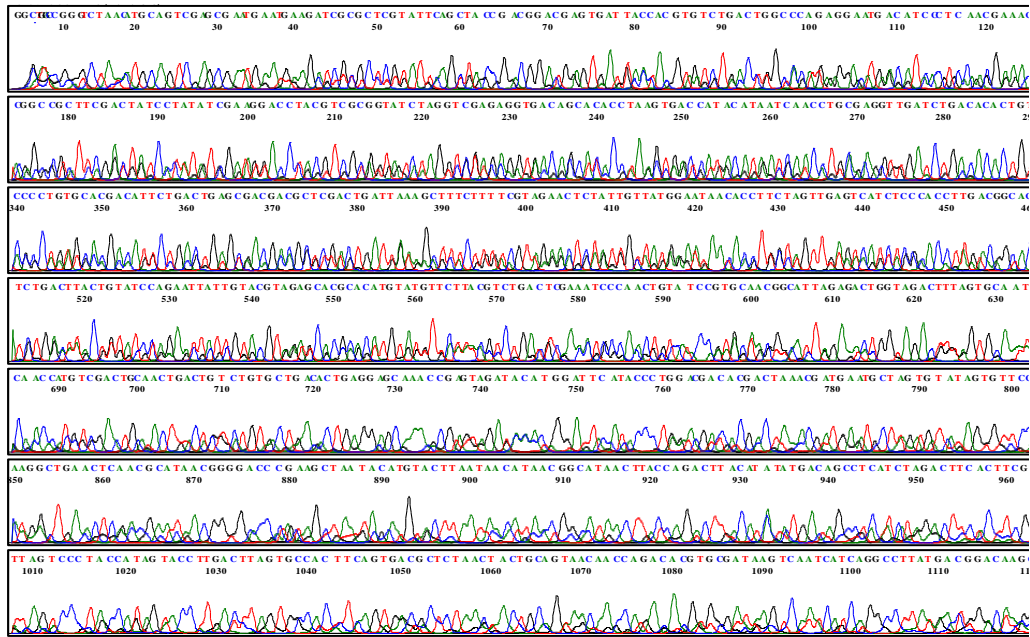

- Isolat H4

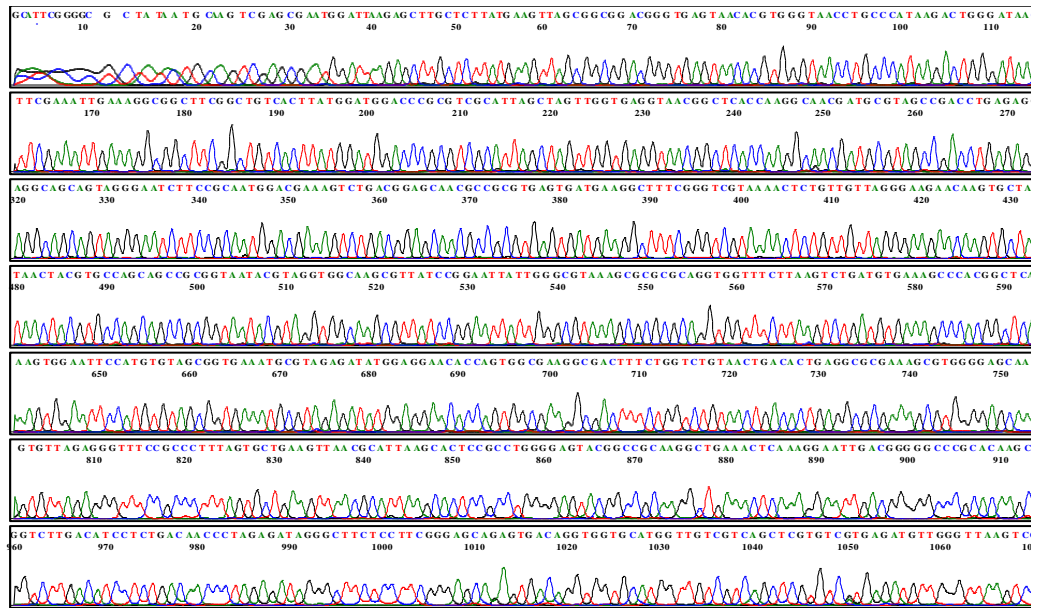

- Isolat H8

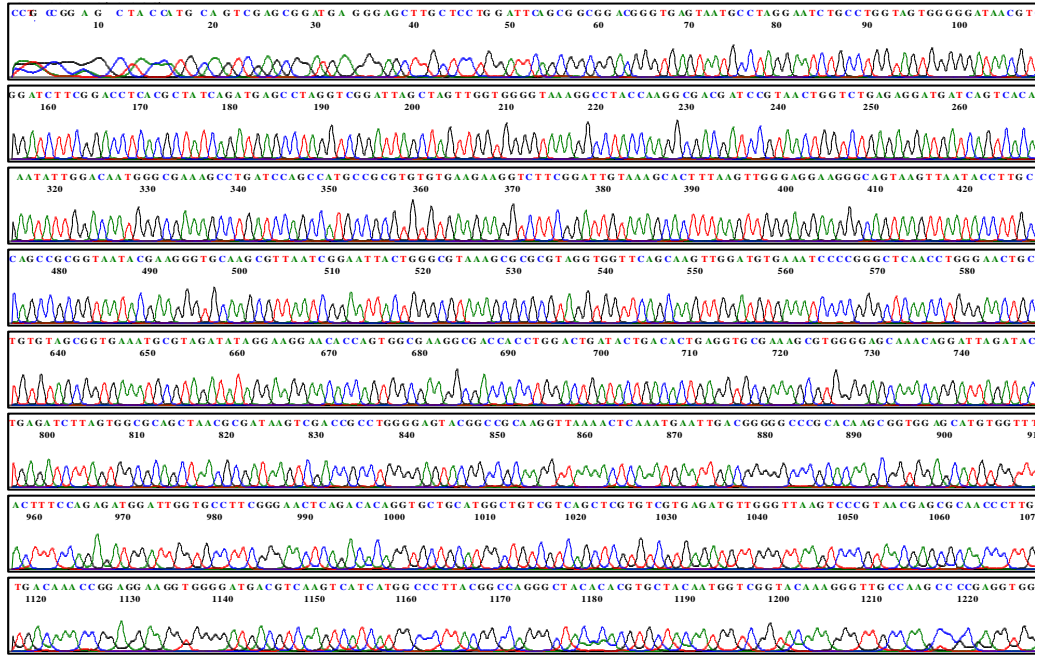

- Isolat H9

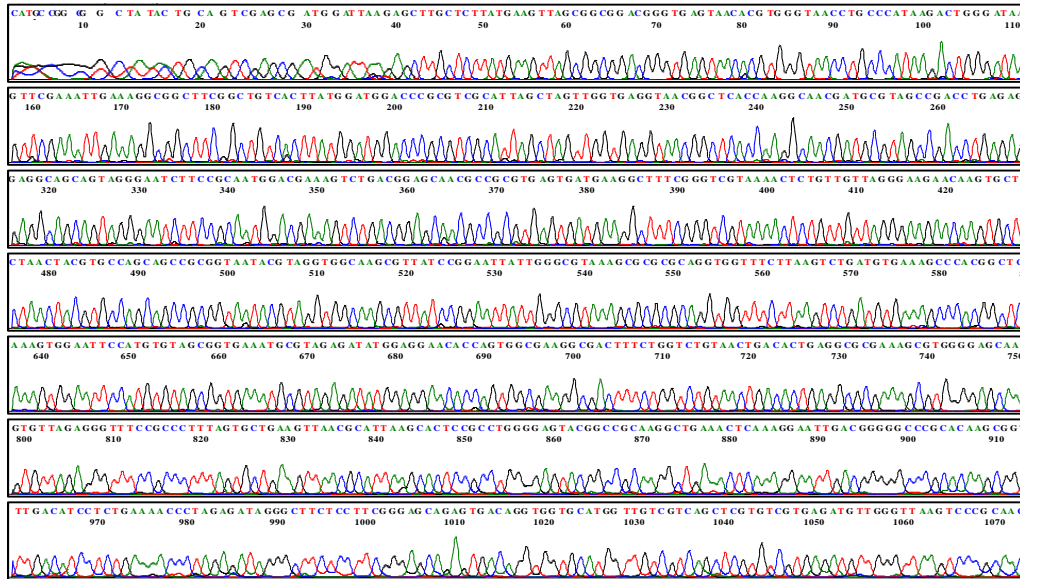

- H10

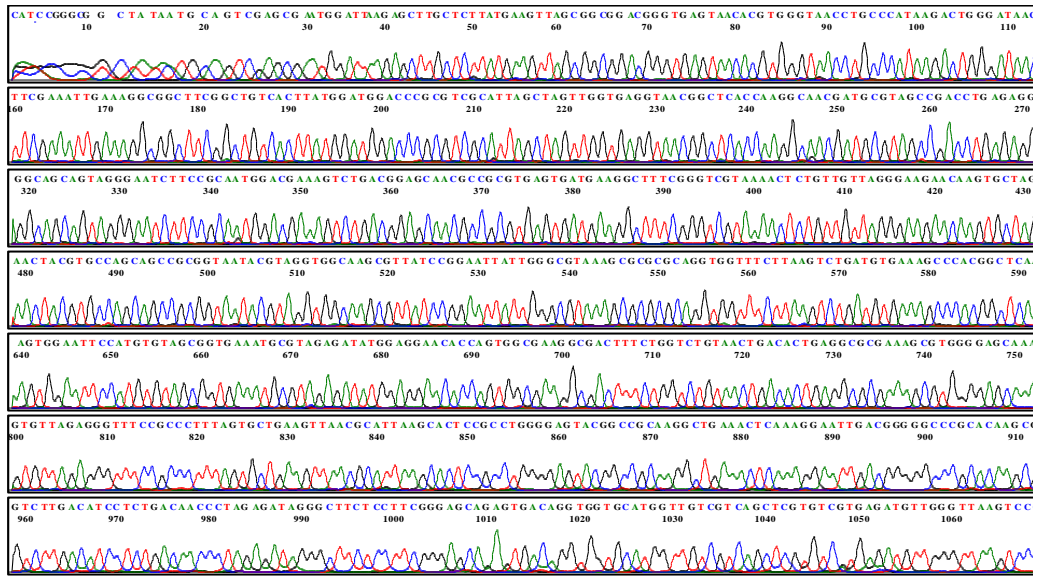

- H12

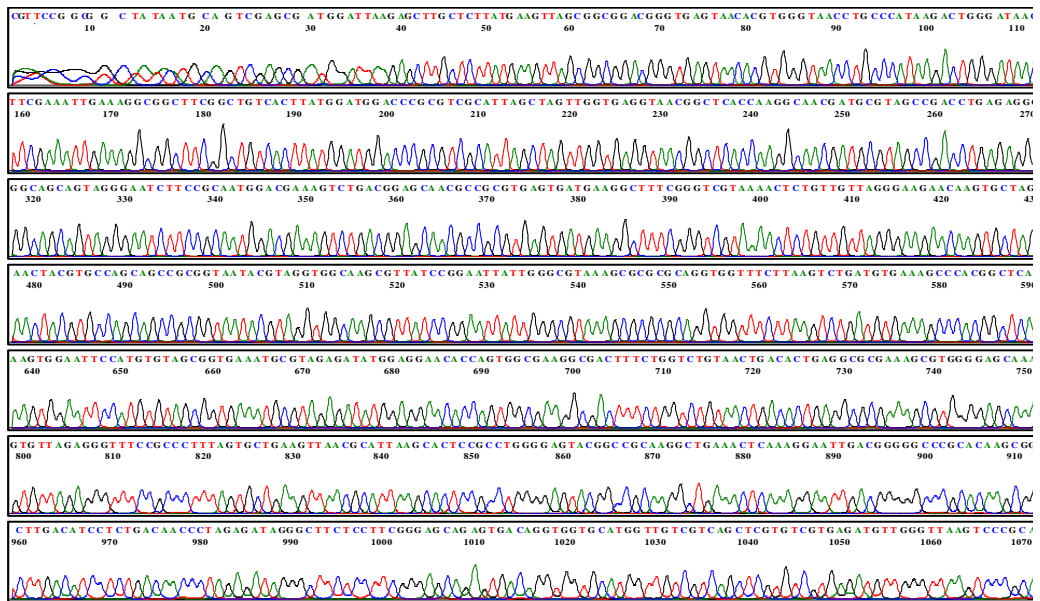

- Isolat H15

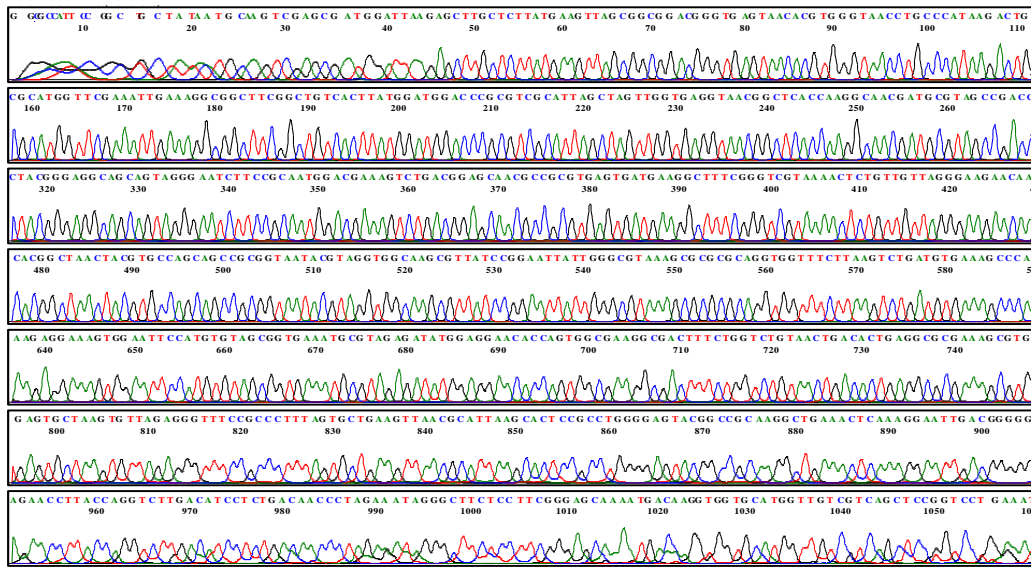

- Isolat H16

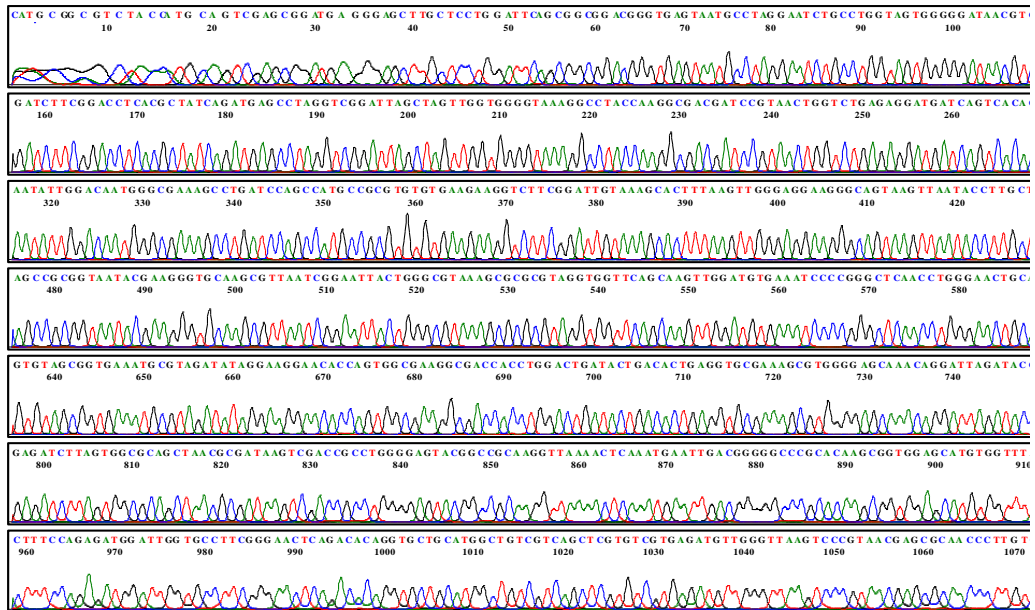

- Isolat H17

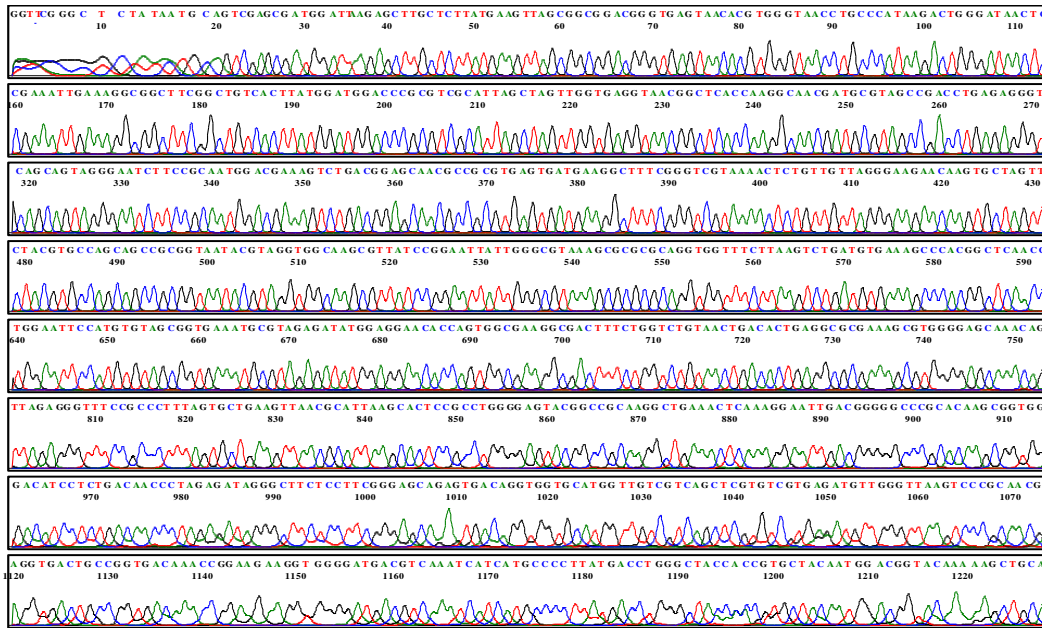

- Isolat H24

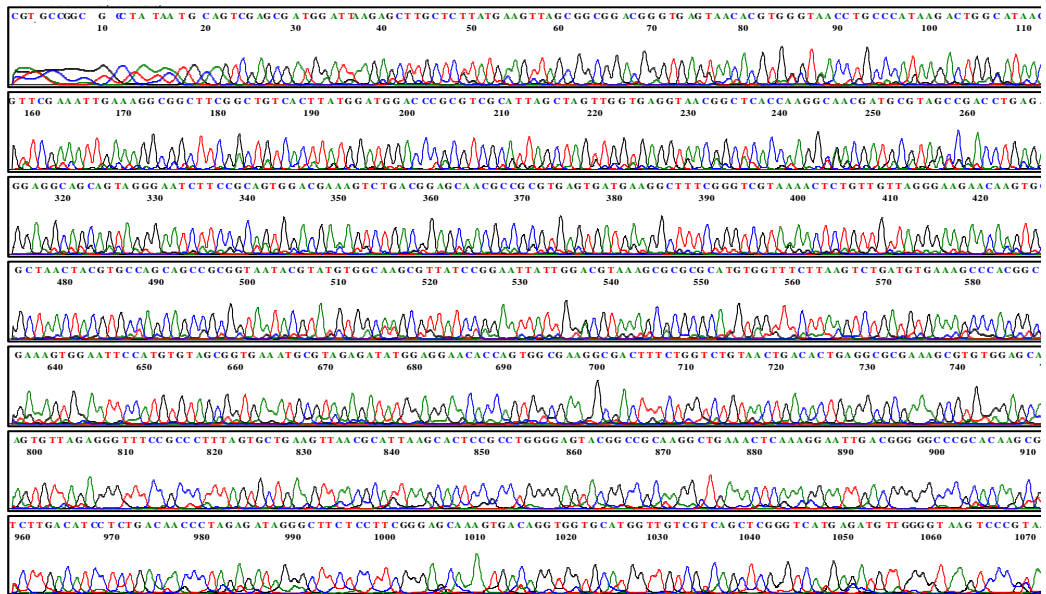

Table 2. FASTA DNA sequence of each Isolate.

| Isolate     | Fasta DNA                                                                                                                                                                                                                                                                                                                                                                                                                                                                                                                                                                                                                                                                                                                                                                                                                                                                                                                                                                                                                                                                                                                                                                                                                                                                                                                                                                                                                                                                                                                                                                                  |
|-------------|--------------------------------------------------------------------------------------------------------------------------------------------------------------------------------------------------------------------------------------------------------------------------------------------------------------------------------------------------------------------------------------------------------------------------------------------------------------------------------------------------------------------------------------------------------------------------------------------------------------------------------------------------------------------------------------------------------------------------------------------------------------------------------------------------------------------------------------------------------------------------------------------------------------------------------------------------------------------------------------------------------------------------------------------------------------------------------------------------------------------------------------------------------------------------------------------------------------------------------------------------------------------------------------------------------------------------------------------------------------------------------------------------------------------------------------------------------------------------------------------------------------------------------------------------------------------------------------------|
| >H2 bp 1271 | <p>GGCTGAGCCGGTCTAACATGCAGTCGAGCGAATGAATGAAGATCGCG<br/> CTCGTATTACAGCTACCGACGGACGAGTGATTACCACGTGTCTGACTGGC<br/> CCAGAGGAATGACATCCCTCAACGAAACCTGGTCTCATAACAGCACCTC<br/> ATTTTGAACCTCATGGATCTTCATTCCACGGCCGCTTCGACTATCCTATA<br/> TCGAAGGACCTACGTCGCGGTATCTAGGTCGAGAGGTGACAGCACACC<br/> TAAGTGACCATAACATAATCAACCTGCGAGGTTGATCTGACACACTGTCA<br/> CTAATCCTCCGGCAAGACTCCTACGGGAAGCTTCAATAATGAATCATCC<br/> CCTGTGCACGACATTCTGACTGAGCGACGACGCTCGACTGATTAAAGCT<br/> TTCTTTTCGTAGAACTCTATTGTTATGGAATAACACCTTCTAGTTGAGTC<br/> ATCTCCCACCTTGACGGCACCTAATCACATCGTGACAGCTAACTACGTG<br/> CCACCAACCGCGCTAGTACTTATCTGACTTACTGTATCCAGAATTATTG<br/> TACGTAGAGCACGCACATGTATGTTCTTACGTCTGACTCGAAATCCCAA<br/> CTGTATCCGTGCAACGGCATTAGAGACTGGTAGACTTTAGTGCAATTAC<br/> TATAGTGCAATGCATGTGTAGATTGAAATGCATCAACATTGGCAAGAA<br/> CAACCATGTGCGACTGCAACTGACTGTCTGTGCTGACACTGAGGAGCAA<br/> ACCGAGTAGATACATGGATTACATACCCTGGACGACACGACTAAACGAT<br/> GAATGCTAGTGTATAGTGTCCGCCATTCGGCTGACTTCACCAGTAAGA<br/> CCCCCTGGGAGTACCTACAAGGCTGAACTCAACGCATAACGGGGAC<br/> CCGAAGCTAATACATGTACTTAATAACATAACGGCATAACTTACCAGA<br/> CTTACATATATGACAGCCTCATCTAGACTTCACTTCGGATCCAGGACGC<br/> TCAGCACGGTCTCACACTCGGTCAGACCGTACGTTAGTCCCTACCATAG<br/> TACCTTGACTTAGTGCCACTTCAGTGACGCTCTAACTACTGCAGTAACA<br/> ACCAGACACGTGCGATAAGTCAATCATCAGGCCTTATGACGGACAAGC<br/> ACGTCTAAATGTACGAACAAAAGTTTCAGACATCCGTGAACTATCTATA<br/> AACTTTCTACTCAATTGATGCTGAGTCGCTCCTGAGCTGGATCCAAAAT<br/> CCCGATCACATTCCCGGGAATAGTTCGCGCTTAACTGGCGTCATCC<br/> TCAAA</p>                                                                                                  |
| >H4 bp 1361 | <p>GCATTCGGGGCGCTATAATGCAAGTCGAGCGAATGGATTAAGAGCTTG<br/> CTCTTATGAAGTTAGCGGCGGACGGGTGAGTAACACGTGGGTAACCTG<br/> CCCATAAGACTGGGATAACTCCGGGAAACCGGGGCTAATACCGGATAA<br/> CATTTTGAACCGCATGGTTCGAAATTGAAAGGCGGCTTCGGCTGTCACT<br/> TATGGATGGACCCGCGTCGCATTAGCTAGTTGGTGAGGTAACGGCTCAC<br/> CAAGGCAACGATGCGTAGCCGACCTGAGAGGGTGATCGGCCACACTGG<br/> GACTGAGACACGGCCCAGACTCCTACGGGAGGCAGCAGTAGGGAATCT<br/> TCCGCAATGGACGAAAGTCTGACGGAGCAACGCCGCGTGAGTGATGAA<br/> GGCTTTCGGGTCGTAAAACCTCTGTTGTTAGGGAAGAACAAGTGCTAGTT<br/> GAATAAGCTGGCACCTTGACGGTACCTAACCAGAAAAGCCACGGCTAAC<br/> TACGTGCCAGCAGCCGCGTAATACGTAGGTGGCAAGCGTTATCCGGA<br/> ATTTATGGGCGTAAAGCGCGCGCAGGTGGTTTCTTAAGTCTGATGTGAA<br/> AGCCCACGGCTCAACCGTGGAGGGTCATTGGAACTGGGAGACTTGAG<br/> TGCAGAAGAGGAAAGTGAATTCATGTGTAGCGGTGAAATGCGTAGA<br/> GATATGGAGGAACACCAGTGGCGAAGGCGACTTTCTGGTCTGTAACCTG<br/> ACACTGAGGCGCGAAAGCGTGGGGAGCAAACAGGATTAGATACCCTGG<br/> TAGTCCACGCCGTAAACGATGAGTGCTAAGTGTTAGAGGGTTTCGCCC<br/> TTTAGTGCTGAAGTTAACGCATTAAGCACTCCGCCTGGGGAGTACGGCC<br/> GCAAGGCTGAAACTCAAAGGAATTGACGGGGGGCCCGCACAAAGCGGTG<br/> GAGCATGTGGTTTAATTCGAAGCAACGCGAAGAACCCTTACCAGTCTT<br/> GACATCCTCTGACAACCCTAGAGATAGGGCTTCTCCTTCGGGAGCAGA<br/> GTGACAGGTGGTGCATGGTTGTCGTCAGCTCGTGTGCTGAGATGTTGGG<br/> TTAAGTCCCGAACGAGCGCAACCCTTGATCTTAGTTGCCATCATTAG<br/> TTGGGCACTCTAAGGTGACTGCCGGTGACAAACCGGAGGAAGGTGGGG<br/> ATGACGTCAAATCATCATGCCCTTATGACCTGGGGTACCCACGTGCTA<br/> CAATGGACGGTACCAAAGAGCTGCAAGACCCGCGAGGTGGAACCTAAT<br/> CTATAAAACCCGTTCTCAGTTCCGAATTGAAGGCTGGAACCTCCGCTA<br/> CATGAAACTTGAATCGCTAAGTAATCCCCGAATCAACCTTGCCCCGG<br/> TGGATAC</p> |
| >H8 bp 1240 | <p>CCTGCCGGAGCTACCATGCAGTCGAGCGGATGAGGGAGCTTGCTCCTG<br/> GATTACAGCGGCGGACGGGTGAGTAATGCCTAGGAATCTGCCTGGTAGT<br/> GGGGGATAACGTCCGAAACGGGCGCTAATACCGCATAACGTCCTGAGG<br/> GAGAAAGTGGGGGATCTTCGGACCTCACGCTATCAGATGAGCCTAGGT<br/> CGGATTAGCTAGTTGGTGGGGTAAAGGCCTACCAAGGCGACGATCCGT<br/> AACTGGTCTGAGAGGATGATCAGTCACACTGGAACCTGAGACACGGTCC</p>                                                                                                                                                                                                                                                                                                                                                                                                                                                                                                                                                                                                                                                                                                                                                                                                                                                                                                                                                                                                                                                                                                                                                                                                                                                    |

|              |                                                                                                                                                                                                                                                                                                                                                                                                                                                                                                                                                                                                                                                                                                                                                                                                                                                                                                                                                                                                                                                                                                                                                                                                                                                                                                                                                  |
|--------------|--------------------------------------------------------------------------------------------------------------------------------------------------------------------------------------------------------------------------------------------------------------------------------------------------------------------------------------------------------------------------------------------------------------------------------------------------------------------------------------------------------------------------------------------------------------------------------------------------------------------------------------------------------------------------------------------------------------------------------------------------------------------------------------------------------------------------------------------------------------------------------------------------------------------------------------------------------------------------------------------------------------------------------------------------------------------------------------------------------------------------------------------------------------------------------------------------------------------------------------------------------------------------------------------------------------------------------------------------|
|              | <p>AGACTCCTACGGGAGGCAGCAGTGGGGAATATTGGACAATGGGGCGAAA<br/> GCCTGATCCAGCCATGCCGCGTGTGTGAAGAAGGTCTTCGGATTGTAAA<br/> GCACTTTAAGTTGGGAGGAAGGGCAGTAAGTTAATACCTTGCTGTTTTG<br/> ACGTTACCAACAGAATAAGCACCGGCTAACTTCGTGCCAGCAGCCGCG<br/> GTAATACGAAGGGTGCAAGCGTTAATCGGAATTACTGGGCGTAAAGCG<br/> CGCGTAGGTGGTTACGCAAGTTGGATGTGAAATCCCCGGGCTCAACCT<br/> GGGAACTGCATCCAAACTACTGAGCTAGAGTACGGTAGAGGGTGGTG<br/> GAATTTCTAACTCAAATGAATTGACGGGGGCCCGCACAAGCGGTGGA<br/> GCATGTGGTTTAATTCGAAGCAACGCGAAGAACCTTACCTGGCCTTGAC<br/> ATGCTGAGAACTTTCCAGAGATGGATTGGTGCCTTCGGGAACTCAGAC<br/> ACAGGTGCTGCATGGCTGTCGTCAGCTCGTGTCTGTGAGATGTTGGGTTA<br/> AGTCCCCTAACGAGCGCAACCCTTGTCTTAGTTACCAGCACCTCGGGT<br/> GGCACTCTAAGGAGACTGCCGGTGACAAACCGGAGGAAGGTGGGGA<br/> TGACGTCAAGTCATCATGGCCCTTACGGCCAGGGCTACACACGTGCTAC<br/> AATGGTCCGTACAAAGGGTTGCCAAGCCGCGAGGTGGAGCTAATCCCA<br/> TAAACCGATCGTAGTCCGGATCGCAGTCTGCAACTCGACTGCGTGAA<br/> GTCGGAATCGCTAGTAATCGTGAATCAGAATGTCACGGTGAATACGTT<br/> CCGGGCTTGTACACACCGCCGTCACACCATGGGAGTGGGTTGCTCCA<br/> GAAGTAGCTAGTCTAACCAGGAGGGGACGGTTACCACGGAGTGATTC<br/> ATGACTGGGGTGAAGTCGTATAAGAGCCTCGCC</p>                                                                                                                                                                                                                                       |
| >H9 bp 1160  | <p>GGGGTTAATTCCGGGATAACATTTTGAACCCCATGGTTCGAAATTGA<br/> AAGGCGCTTCGGCTGTCACTTATGGATGGACCCGCGTCGATTAGCTA<br/> GTTGGTGAGGTAACGGCTCACCAAGGCAACGATGCGTAGCCGACCTGA<br/> GAGGGTGATCGGCCACACTGGGACTGAGACACGGCCAGACTCCTACG<br/> GGAGGCAGCAGTAGGGAATCTTCCGCAATGGACGAAAGTCTGACGGAG<br/> CAACGCCGCGTGAGTGATGAAGGCTTTCGGGTCGTAAAACCTGTGTGT<br/> AGGGAAGAACAAGTGCTAGTTGAATAAGCTGGCACCTTGACGGTACCT<br/> AACCAGAAAGCCACGGCTAACTACGTGCCAGCAGCCGCGTAATACGT<br/> AGGTGGCAAGCGTTATCCGGAATTATTGGGCGTAAAGCGCGCAGGT<br/> GGTTTCTTAAGTCTGATGTGAAAGCCCACGGCTCAACCGTGGAGGGTCA<br/> TTGGAAACTGGGAGACTTGAGTGCAGAAGAGGAAAGTGAATTCCATG<br/> TGTAGCGGTGAAATGCGTAGAGATATGGAGGAACACCAGTGGCGAAGG<br/> CGACTTCTGGTCTGTAAGTACTGACTGAGGCGCGAAAGCGTGGGGAGC<br/> AAACAGGATTAGATACCCTGGTAGTCCACGCCGTAACGATGAGTGCT<br/> AAGTGTTAGAGGGTTTCCGCCCTTATGTGCTGAAGTTAACGCATTAAGC<br/> ACTCCGCCTGGGGAGTACGGCCGCAAGGCTGAAAACCTCAAAGGAATTGA<br/> CGGGGGCCCGCACAAGCGGTGGAGCATGTGGTTTAATTCGAAGCAACG<br/> CGAAGAACCCTTACCAGGTCTTGACATCCTCTGAAAACCTAGAGATAG<br/> GGCTTCTCCTTCGGGAGCAGAGTGACAGGTGGTGCATGGTTGTCGTCAG<br/> CTCGTGTCTGTGAGATGTTGGGTTAAGTCCCGCAACGAGCGCAACCCTTG<br/> ATCTTAGTTGCCATCATTAAAGTTGGGACTCTAAGGTGACTGCCGTTGA<br/> CAAAACCGGAGGAAGGTGGGATGACGTCAAATCATCATGCCCTTATG<br/> ACCTGGGCTACACACGTGCTACAATGGACGGTACAAAGAGCTGCAAGA<br/> CCGCGAGGTGGAGCTAATCTCATAAAACCGTTCTCAGTTCGGATTGTA</p> |
| >H10 bp 1278 | <p>GCCGCCAAAGACTGGAAATCGGGAACCGGGTTATCCGGATACATTTGA<br/> CCGCTGGTGCAAAATGAAGGCGCTTGGCTTCATTAGGATGACCGGGTCC<br/> ATTACTAGTGGTGGGTACCGCTCCCAAGCACGATCGTACCGCCTGAAG<br/> GGGATGGCCCCCTGGATGAGCCCGGCCAGATCCTACGGGAGCAGCGAG<br/> GGATCTTCGCAATGAGAAAGTCTGACGAGCAAGCCGCTGATGAAGAA<br/> GTTTTCGGTCGTAAACTCGTTGTTAGGAAGACCAATGCTAGTGAATAGC<br/> TGGCACTTGACGGACCTACCAGAAGCCCGGCTAATTCGTGCAGCAGCG<br/> CGGTAATCGTAGGGGCAACGTTATCGGAATTATGGCGTAAGCGCCGCA<br/> GTGGTTTCTAAGTCTGATGGAAAGCCAGGCTACCCGGTGGAGTTCATG<br/> AAACTGGGGACTGAGTGCAAAGAGAAAGTGAATTCCAGGGTAGCGGG<br/> AAATGCGTAAGATAGGAGAACCAGTGCGAAGCGACTTCTGGTCTGT<br/> AATGACACAGGGGCGAAAGCGTGGGAGCAACAGGATAGATACCCGGT<br/> AGTCCAGCCGTAACGATGAGTGCTAAGGTTAGAGGGTTTCCGCCCTTGA<br/> GTGCTGAAGTAACGCATTAAGCACTCCGCCTGGGGAGTACGGCCGCAA<br/> GGCTGAAAACCTCAAAGGAATTGACGGGGGCCCGCACAAGCGGTGGAGC<br/> ATGTGGTTTAATTGGAAGCAACGCGAAGAACCTTACCAGGTCTTGACAT<br/> CTTCTGCAACCCTAGAGATAGGGCTTCTCCTTCGGGAGCAGAGTGACAG<br/> GTGGTGCATGGTTGTCGTCAGCTCGTGTCTGTGAGATGTTGGGTTAAGTC<br/> CCGGAACGAGCGCAACCCTTATGATCTTAGTTGCCATCATTAGTTGGCCA<br/> CTCTAAGGTGACTGCCGGTGACAAACCGGAGGAAGGTGGGGATGACGT<br/> CAAATCATCATGCCCTTATGACCTGGGCTACACACGTGCTCCAATGGA<br/> CGGTACAAAGAGCTGCAAGACCGCGAGGTGGAGCTAATCTCATAAAAC<br/> CGTTCTCAGTTCGGATTGTAGGCTGCAACTCGCCTACATGAAGCTGGAA</p>                                                |



|              |                                                                                                                                                                                                                                                                                                                                                                                                                                                                                                                                                                                                                                                                                                                                                                                                                                                                                                                                                                                                                                                                                                                                                                                                                                                                                                                                                                                                                                                                                                                         |
|--------------|-------------------------------------------------------------------------------------------------------------------------------------------------------------------------------------------------------------------------------------------------------------------------------------------------------------------------------------------------------------------------------------------------------------------------------------------------------------------------------------------------------------------------------------------------------------------------------------------------------------------------------------------------------------------------------------------------------------------------------------------------------------------------------------------------------------------------------------------------------------------------------------------------------------------------------------------------------------------------------------------------------------------------------------------------------------------------------------------------------------------------------------------------------------------------------------------------------------------------------------------------------------------------------------------------------------------------------------------------------------------------------------------------------------------------------------------------------------------------------------------------------------------------|
|              | TCGCTAGTAATCGCGGATCAGCATGCCGCGGTGAATACGTTCCCGGGCC<br>TTGTACACACCCGCCGTACACCACGAGAGTTTGTAAACCCCGAAGTCG<br>GTGGGGTAAACCTTTTGGAGCCAGCCGCCTAAGGTGGGACAGATGATGG<br>GGTGAAGTCGTAACAAGTGCTGC                                                                                                                                                                                                                                                                                                                                                                                                                                                                                                                                                                                                                                                                                                                                                                                                                                                                                                                                                                                                                                                                                                                                                                                                                                                                                                                                   |
| >H12 bp 1360 | CGTTCGCGGCTATAATGCAGTCGAGCGATGGATTAAGAGCTTGCTCT<br>TATGAAGTTAGCGGCGGACGGGTGAGTAACACGTGGGTAACCTGCCCA<br>TAAGACTGGGATAACTCCGGGAAACCGGGGCTAATACCGGATAACATT<br>TTGAACCGCATGGTTCGAAATTGAAAGGCGGCTTCGGCTGTCACTTATG<br>GATGGACCCCGCTCGCATTAGCTAGTTGGTGAGGTAACGGCTCACCAA<br>GGCAACGATGCGTAGCCGACCTGAGAGGGTGATCGGCCACACTGGGAC<br>TGAGACACGGCCCAGACTCCTACGGGAGGCAGCAGTAGGGAATCTTCC<br>GCAATGGACGAAAAGTCTGACGGAGCAACGCCGCTGAGTGATGAAGGC<br>TTTCGGGTCGTAAAACCTCTGTTGTTAGGGAAGAACAAGTGCTAGTTGAA<br>TAAGCTGGCACCTTGACGGTACCTAACAGAAAGCCACGGCTAACTAC<br>GTGCCAGCAGCCGCGGTAATACGTAGGTGGCAAGCGTTATCCGGAATT<br>ATTGGGCGTAAAGCGCGCGCAGGTGGTTTCTTAAGTCTGATGTGAAAG<br>CCCACGGCTCAACCGTGGAGGGTCATTGGAAACTGGGAGACTTGAGTG<br>CAGAAGAGGAAAGTGGAATTCATGTGTAGCGGTGAAATGCGTAGAGA<br>TATGGAGGAACACCAGTGGCGAAGGCGACTTCTGGTCTGTAACATGAC<br>ACTGAGGCGGAAAGCGTGGGGAGCAAACAGGATTAGATACCCTGGTA<br>GTCCACGCCGTAAACGATGAGTGCTAAGTGTTAGAGGGTTTCCGCCCTT<br>TAGTGCTGAAGTTAACGCATTAAGCACTCCGCCTGGGGAGTACGGCCG<br>CAAGGCTGAAACTCAAAGGAATTGACGGGGGCCCGCACAAAGCGGTGG<br>AGCATGTGGTTAATTCGAAGCAACGCGAAGAACCTTACCAGGTCTTG<br>ACATCCTCTGACAACCTAGAGATAGGGCTTCTCCTTCGGGAGCAGAGT<br>GACAGGTGGTGCATGGTTGTCGTCAGCTCGTGTGTCGTGAGATGTTGGGT<br>AAGTCCCAGCAACGAGCGCAACCCTTGATCTTAGTTGCCATCATTAGT<br>GGGCACTCTAAGGTGACTGCCGGTGACAAACCGGGAAGGTGGGGAT<br>GACGTCAAATCATCATGCCCTTATGACCTGGGCTACACACGTGCTACA<br>ATGGACGGTACAAAGAGCTGCAAGACCGCCAGGTGGAGCTAATCTCAT<br>AAAACCGTTCTCAGTTCGGATTGTAGGCTGCAACTCGCCTACATGAAGC<br>TGGAATCGCTAGTAATCGCGGATCAGCATGGCCCCGGTGAATACGTTTC<br>CCGGCA |
| >H15 bp 1253 | GCTCTTATGAAGTTAGCGGCGGACGGGTGAGTAACACGTGGGTAACCT<br>GCCATAAGACTGGGATAACTCCGGGAAACCGGGGCTAATACCGGATA<br>ACATTTTGAACCGCATGGTTCGAAATTGAAAGGCGGCTTCGGCTGTAC<br>TTATGGATGGACCCGCTCGCATTAGCTAGTTGGTGAGGTAACGGCTCA<br>CCAAGGCAACGATGCGTAGCCGACCTGAGAGGGTGATCGGCCACACTG<br>GGACTGAGACACGGCCCAGACTCCTACGGGAGGCAGCAGTAGGGAATC<br>TTCCGCAATGGACGAAAAGTCTGACGGAGCAACGCCGCTGAGTGATGA<br>AGGCTTTCGGGTCGTAAAACCTCTGTTGTTAGGGAAGAACAAGTGCTAGT<br>TGAATAAGCTGGCACCTTGACGGTACCTAACAGAAAGCCACGGCTAA<br>CTACGTGCCAGCAGCCGCGGTAATACGTAGGTGGCAAGCGTTATCCGG<br>AATTATTGGGCGTAAAGCGCGCGCAGGTGGTTTCTTAAGTCTGATGTGA<br>AAGCCACGGCTCAACCGTGGAGGGTCATTGGAAACTGGGAGACTTGA<br>GTGCAGAAAGAGGAAAGTGGAATTCATGTGTAGCGGTGAAATGCGTAG<br>AGATATGGAGGAACACCAGTGGCGAAGGCGACTTCTGGTCTGTAAC<br>GACTGAGGCGGAAAGCGTGGGGAGCAAACAGGATTAGATACCCTG<br>GTAGTCCACGCCGTAAACGATGAGTGCTAAGTGTTAGAGGGTTTCCGCC<br>CTTAGTGCTGAAGTTAACGCATTAAGCACTCCGCCTGGGGAGTACGGC<br>CGCAAGGCTGAAACTCAAAGGAATTGACGGGGGCCCGCACAAAGCGGTG<br>GAGCATGTGGTTTAATTCGAAGCAACGCGAAGAACCTTACCAGGTCTT<br>GACATCCTCTGACAACCTAGAAATAGGGCTTCTCCTTCGGGAGCAAA<br>ATGACAAGGTGGTGCATGGTTGTCGTCAGCTCCGGTCTGAAATGTTGG<br>GTTAAGTCCCAGCAACGAGCGCAACCCTTGATCTTAGTTGCCATCATTCA<br>GTTGGCACCCCTAAGGTGACTTCCGGGTGACAAACCGGAAGGAAGGTG<br>GGGGATGAACGTCAAATCCTCATGGCCCCTAATGGACCTGGGCCTACC<br>ACCGTGCTACAATGGAACGGTACAAAAGACTTCAAAAACCGCCAGGT<br>GGAACCTAATTCCCAAAAACCCGTTCCAGGTTCCGAATTGGAA                                                                                                                            |
| >H16 bp 927  | ACCGCCTGGGGAGTACGGCCGCAAGGTTAAAACCTCAAATGAATTGACG<br>GGGGCCCCGACAAGCGGTGGAGCATGTGGTTTAATTCGAAGCAACGCG<br>AAGAACCTTACCTGGCCTTGACATGCTGAGAACTTCCAGAGATGGATT<br>GGTGCTTCGGAACTCAGACACAGGTGCTGCATGGCTGTCGTAGCTC<br>GTGTCGTGAGATGTTGGGTTAAGTCCCGTAAACGAGCGCAACCCCTG<br>TTAGTTACCAGCACCTCGGGTGGGCACTCTAAGGAGACTGCCGGTGAC<br>AAACCGGAGGAAGGTGGGGATGACGTCAAGTCATCATGGCCCTTACGG<br>CCAGGGCTACACACGTGCTACAATGGTCCGTACAAAGGGTTGCCAAGC                                                                                                                                                                                                                                                                                                                                                                                                                                                                                                                                                                                                                                                                                                                                                                                                                                                                                                                                                                                                                                                                                              |

|              |                                                                                                                                                                                                                                                                                                                                                                                                                                                                                                                                                                                                                                                                                                                                                                                                                                                                                                                                                                                                                                                                                                                                                                                                                                                                                                                                                                                                                                                                                                                                                                                                                 |
|--------------|-----------------------------------------------------------------------------------------------------------------------------------------------------------------------------------------------------------------------------------------------------------------------------------------------------------------------------------------------------------------------------------------------------------------------------------------------------------------------------------------------------------------------------------------------------------------------------------------------------------------------------------------------------------------------------------------------------------------------------------------------------------------------------------------------------------------------------------------------------------------------------------------------------------------------------------------------------------------------------------------------------------------------------------------------------------------------------------------------------------------------------------------------------------------------------------------------------------------------------------------------------------------------------------------------------------------------------------------------------------------------------------------------------------------------------------------------------------------------------------------------------------------------------------------------------------------------------------------------------------------|
|              | <p>CGCGAGGTGGAGCTAATCCATAAAAACCGATCGTAGTCCGGATCGCAG<br/> TCTGCAACTCGACTGCGTGAAGTCGGAATCGCTAGTAATCGTGAATCAA<br/> AATGTCACGGTGAACCTGGGTTAAGTCCCGTAACGAGCGCAACCCTTG<br/> TCCTTAGTTACCAGCACCTCGGGTGGGCACTCTAAGGAGACTGCCGGTG<br/> ACAAACCGGAGGAAGGTGGGGATGACGTCAAGTCATCATGGCCCTTAC<br/> GGCCAGGGCTACACACGTGCTACAATGGTCGGTACAAAGGGTTGCCAA<br/> GCCGCGAGGTGGAGCTAATCCATAAAAACCGATCGTAGTCCGGATCGC<br/> AGTCTGCAACTCGACTGCGTGAAGTCGGAATCGCTAGTAATCGTGAATC<br/> AGAATGTCACGGTGAATACGTTCCCGGGCCTTGACACACCGCCCGTCA<br/> CACCATGGGAGTGGGTTGCTCCAGAAGTAGCTAGTCTAACCGCAAGGG<br/> GGACGGTTACCACGGAGTGATTCATGACTGGGGTGAAGTCGTAACAAG<br/> TGCCTGCC</p>                                                                                                                                                                                                                                                                                                                                                                                                                                                                                                                                                                                                                                                                                                                                                                                                                                                                                                                                                                            |
| >H17 bp 1195 | <p>TGAAGTTAGCGGCGACGGGTGAGTAACACGTGGGTAACCTGCCATA<br/> AGACTGGGATAACTCCGGGAAACCGGGGCTAATACCGGATAACATTTT<br/> GAACCGCATGGTTCGAAATTGAAAGGCGGCTTCGGCTGTCACCTTATGG<br/> ATGGACCCGCGTCGCATTAGCTAGTTGGTGAGGTAACGGCTCACCAAG<br/> GCAACGATGCGTAGCCGACCTGAGAGGGTGATCGGCCACACTGGGACT<br/> GAGACACGGCCAGACTCCTACGGGAGGCAGCAGTAGGGAATCTTCCG<br/> CAATGGACGAAAGTCTGACGGAGCAACGCCGCGTGAGTGATGAAGGCT<br/> TTCGGGTGCTAAAACCTGTTTGTAGGGAAGAACAAGTGCTAGTTGAAT<br/> AAGCTGGCACCTTGACGGTACCTAACCAGAAAGCCACGGCTAACTACG<br/> TGCCAGCAGCCGCGTAATACGTAGGTGGCAAGCGTTATCCGGAATTA<br/> TTGGGCGTAAAGCGCGCGCAGGTGGTTTCTTAAGTCTGATGTGAAAGCC<br/> CACGGCTCAACCGTGGAGGGTCATTGGAAACTGGGAGACTTGAGTGCA<br/> GAAGAGGAAAGTGAATTCATGTGTAGCGGTGAAATGCGTAGAGATA<br/> TGGAGGAACACCAGTGGCGAAGGCGACTTCTGGTCTGTAACGTGACAC<br/> TGAGGCGCGAAAGCGTGGGGAGCAAACAGGATTAGATACCCTGGTAGT<br/> CCACGCCGTAACGATGAGTGCTAAGTGTTAGAGGGTTTCCGCCCTTTA<br/> GTGCTGAAGTTAACGCATTAAGCACTCCGCCTGGGGAGTACGGCCGCA<br/> AGGCTGAAACTCAAAGGAATTGACGGGGGCCCGCACAAAGCGGTGGAG<br/> CATGTGGTTTAATTCGAAGCAACGCGAAGAACCTTACCAGGTCTTGACA<br/> TCCTCTGACAACCCTAGAGATAGGGCTTCTCCTTCGGGAGCAGAGTGAC<br/> AGGTGGTGCATGGTTGTCGTCAGCTCGTGTGCTGAGATGTTGGGTTAAG<br/> TCCCGGAGCAGCGCAACCCTTGATCTTAGTTGCCATCATTAGTTGGG<br/> CACTCTAAGGTGACTGCGGTGACAAACCGGAAGAAGGTGGGGATGAC<br/> GTCAAATCATCATGCCCTTATGACCTGGGCTACCACCGTGCTACAATG<br/> GACGGTACAAAAGCTGCAAAAACCCCAAGGTGGAGC</p>                                                                                                                                                                                                                        |
| >H24 bp 1391 | <p>CGTGCCGGCGCCTATAATGCAGTCGAGCGATGGATTAAGAGCTTGCTCT<br/> TATGAAGTTAGCGGCGACGGGTGAGTAACACGTGGGTAACCTGCCCA<br/> TAAGACTGGCATAACTCCGGGAAACCGGGGCTAATACCGGATAACATT<br/> TTGAACCGCATGGTTCGAAATTGAAAGGCGGCTTCGGCTGTCACCTATG<br/> GATGGACCCGCGTCGCATTAGCTAGTTGGTGAGGTAACGGCTCACCAA<br/> GGCAACGATGCGTAGCCGACCTGAGAGGGTGATCGGCCACACTGGGAC<br/> TGAGACACGGCCAGACTCCTACGGGAGGCAGCAGTAGGGAATCTTCC<br/> GCAGTGGACGAAAGTCTGACGGAGCAACGCCGCGTGAGTGATGAAGGC<br/> TTTCGGGTGCTAAAACCTGTTTGTAGGGAAGAACAAGTGCTAGTTGAA<br/> TAAGCTGGCACCTTGACGGTACCTAACCAGAAAGCCACGGCTAACTAC<br/> GTGCCAGACGCCGCGTAATACGTATGTGGCAAGCGTTATCCGGAATT<br/> ATTGGACGTAAAGCGCGCGCATGTGGTTTCTTAAGTCTGATGTGAAAGC<br/> CCACGGCTCAACCGTGGAGGGTCATTGAAACTGGGAGACTTGAGTGC<br/> AGAAGAGGAAAGTGAATTCATGTGTAGCGGTGAAATGCGTAGAGAT<br/> ATGGAGGAACACCAGTGGCGAAGGCGACTTCTGGTCTGTAACGTGACA<br/> CTGAGGCGCGAAAGCGTGTGGAGCAAACAGGATTAGATACCCTGGTAG<br/> TCCACGCCGTAACGATGAGTGCTAAGTGTTAGAGGGTTTCCGCCCTTT<br/> AGTGCTGAAGTTAACGCATTAAGCACTCCGCCTGGGGAGTACGGCCG<br/> AAGGCTGAAACTCAAAGGAATTGACGGGGGCCCGCACAAAGCGGTGGA<br/> GCATGTGGTTTAATTCGAAGCAACGCGAATAACCTTACCAGGTCTTGAC<br/> ATCCTCTGACAACCCTAGAGATAGGGCTTCTCCTTCGGGAGCAAAGTGA<br/> CAGGTGGTGCATGGTTGTCGTCAGCTCGGGTCATGAGATGTTGGGGTAA<br/> GTCCCCTAACGAGCGCAACCCTTGATCTTAGTTGCCATCATTAGTTGG<br/> GCACTCTAAGGTAACCGGTGACAAACCGGAAGAAGGTGGGGATGA<br/> CGTCAAATCATCATGGCCCTTATGACCTGGGCTACGACCGTGCTACAAT<br/> GTACGGTACAAAAGCTGCAAGACCGCCAGGTGGAACATAATCTCATAA<br/> AACCGTTCTCAGTTCAATTGAAGGCTGCAACTCGCCTACCTGAAGCTT<br/> GAATCGCTAAGTATCCCGGATCAACATGCCCGGGGGGAATACGTTTCCC<br/> GGGCTTTGAACAACCGGCCCGTTCAACCCCGAGC</p> |
